# Supplementary material
Source: publisher site journal article supplement (https://www.dovepress.com/article/443457)
Supplement: Supplementary file 1 [file get_supplementary_file.php]

## Questionnaires

### PART 1: Socio demographic factors

1.1. Age..... In Years

1.2. Sex M.....1

F.....2

1.3. Address Urban ..... 1

Rural ..... 2

1.4. Religion Orthodox....1 Muslim....2 ..... protestant....4 others.....

### Part II. Presenting complaints of the patient

| Presenting complaints of the patient                 | Yes---1 | N0---2 |
|------------------------------------------------------|---------|--------|
| 1. Abdominal pain                                    |         |        |
| 2. Vomiting                                          |         |        |
| 3. Nausea                                            |         |        |
| 4. Abdominal distension                              |         |        |
| 5. Constipation                                      |         |        |
| 6. Previous abdominal surgery                        |         |        |
| 7. Others                                            |         |        |
| Duration of illness before operation (in days) ..... |         |        |

### Part III. Physical examination

| Sign                                                       | Yes---1 | NO---2 |
|------------------------------------------------------------|---------|--------|
| 1. Abdominal tenderness                                    |         |        |
| 2. Guarding                                                |         |        |
| 3. Abdominal distension                                    |         |        |
| 4. visible bowel peristalsis                               |         |        |
| 5. Rectum empty                                            |         |        |
| Vital signs; BP..... PR..... RR..... Tem..... At admission |         |        |

**Part IV. Diagnosis**

4.1. Season of presentation?

- 1. Tseday
- 2. Bega
- 3. Belg
- 4. Kiremt

4.2. What is the diagnosis?

- 1. Appendicitis
- 2. Intestinal obstruction
- 3. Peritonitis
- 4. Others (intestinal obstruction, pancreatitis, cholecystitis etc)

4.3. If Intestinal Obstruction for Q4.2

- 1. Large bowel
- 2. Small bowel

4.4. If large bowel obstruction for Q4.3

1. Sigmoid volvulus
2. Colorectal cancer
3. Ileosigmoid knotting
4. Intussusceptions
5. Others

4.5. If sigmoid volvulus for Q4.4

1. Viable
2. Nonviable

4.6. If colorectal cancer for Q4.4

1. Viable
2. Nonviable

4.7. If Ileosigmoid knotting for Q4.4

1. Viable
2. Nonviable

4.8. If intussusceptions for Q4.4

1. Viable
2. Nonviable

4.9. If Appendicitis for Q4.4

1. Simple appendicitis

2. Complicated appendicitis(perforated,gangrenous,phlegmonous)

3. Periappendiceal abscess

4.10. If small bowel Obstruction,

1. Primary volvulus

2. Adhesion/band

3. Hernia

4. Intussusceptions (ileocolic)

5. Others

4.11. If primary volvulus

1. Viable

2. Nonviable

4.12. If adhesion/band

1. Viable

2. Nonviable

4.13. If hernia

1. Viable

2. Nonviable

4.14. If intussusceptions (ileocolic)

1. Viable

2. Nonviable

4.15. If others

1. Viable

2. Nonviable

4.16. If peritonitis, what is the primary cause?

1. Perforated appendicitis

2. Gangrenous large bowel obstruction

3. Gangrenous small bowel obstruction

4. Perforated PUD

5. Others (mention)

Type of procedure done (write in short) .....

**Part V: What was the complication postoperatively if any?**

| <b>complication postoperatively if any</b>                    | <b>Yes---1</b> | <b>N0---2</b> |
|---------------------------------------------------------------|----------------|---------------|
| 1. Anastomotic leak                                           |                |               |
| 2. Bleeding                                                   |                |               |
| 3. Collection                                                 |                |               |
| 4. Pneumonia                                                  |                |               |
| 5. Sepsis/ Septic shock                                       |                |               |
| 6. Wound infection                                            |                |               |
| 7. Death                                                      |                |               |
| 8. Others (if any, mention)                                   |                |               |
| PV-1: If yes in Part VII What was done (write in short) ..... |                |               |

**Part VI. Postoperative hospital Stay (in days) .....days**

**Part VI I. Condition of the patient on discharge**

| <b>Condition of the patient on discharge</b> | <b>Yes---1</b> | <b>N0---2</b> |
|----------------------------------------------|----------------|---------------|
| 1. Improved                                  |                |               |
| 2. Worsened /Referred                        |                |               |
| 3. Dead                                      |                |               |
